# Supplementary material for: Effects of Long-Term Increases in Water Temperature and Stratification on Large Artificial Water-Source Lakes in South Korea
Source: MDPI journal article supplement (doi:10.3390/w13172341), 2021-08-26
Supplement: s1 [file s1]

## **Supplementary data**

**Effects of long-term increases in water temperature and stratification on  
large artificial water-source lakes in South Korea**

Total pages: 5

Total tables: 3

## **Table of Contents**

**Table S1.** Studied lake dimensions.

**Table S2.** Study site locations and monitoring frequencies.

**Table S3.** Seasonal air temperature trends according to the Mann-Kendall test

**Table S1.** Studied lake dimensions.

| Lake              | Watershed area<br>(km <sup>2</sup> ) | Storage area<br>(km <sup>2</sup> ) | Total storage volume<br>(million ton) | Annual water<br>supply plan<br>(million ton) |
|-------------------|--------------------------------------|------------------------------------|---------------------------------------|----------------------------------------------|
| Soyang<br>(SY)    | 2,703                                | 70                                 | 2,900                                 | 1,213                                        |
| Paldang<br>(PD)   | 23,800                               | 36.5                               | 244                                   | 880                                          |
| Chungju<br>(CJ)   | 6,648                                | 97                                 | 2,750                                 | 3,380                                        |
| Daecheong<br>(DC) | 3,204                                | 72.4                               | 1,490                                 | 1,649                                        |

**Table S2.** Study site locations and monitoring frequencies.

| Lake<br>(abbrev.) | Max. depth | Location      |              | Monitoring<br>frequency |        |
|-------------------|------------|---------------|--------------|-------------------------|--------|
|                   |            | Longitude     | Latitude     | Monthly                 | Weekly |
| Soyang<br>(SY)    | 100        | 127°49'16.05" | 37°56'40.92" | 1993-                   |        |
| Paldang<br>(PD)   | 20         | 127°17'17.02" | 37°31'17.02" | 1993-2003               | 2004   |
| Chungju<br>(CJ)   | 71         | 127°59'47.39" | 37°00'02.52" | 1993-2003               | 2004   |
| Daecheong<br>(DC) | 46         | 127°29'05.04" | 36°28'37.00" | 1993-2003               |        |

**Table S3.** Seasonal air temperature trends according to the Mann-Kendall test

| Site | Season | 1973-2019            |          | 1993-2019 |         |
|------|--------|----------------------|----------|-----------|---------|
|      |        | S                    | slope    | S         | slope   |
| SY   | Spring | 3.84×10 <sup>2</sup> | 0.033**  | 112       | 0.059*  |
|      | Summer | 4.05×10 <sup>2</sup> | 0.035*** | 140       | 0.067** |
|      | Fall   | 3.96×10 <sup>2</sup> | 0.036*** | 114       | 0.046*  |
|      | Winter | 1.32×10 <sup>2</sup> | 0.02     | -5        | 0       |
| PD   | Spring | 5.25×10 <sup>2</sup> | 0.050*** | 125       | 0.067** |
|      | Summer | 4.23×10 <sup>2</sup> | 0.037*** | 158       | 0.068** |
|      | Fall   | 4.88×10 <sup>2</sup> | 0.058*** | 123       | 0.059*  |
|      | Winter | 3.51×10 <sup>2</sup> | 0.056*   | 50        | 0.033   |
| CJ   | Spring | 3.58×10 <sup>2</sup> | 0.032**  | 121       | 0.060*  |
|      | Summer | 2.51×10 <sup>2</sup> | 0.024*   | 150       | 0.075** |
|      | Fall   | 382                  | 0.041*** | 117       | 0.055*  |
|      | Winter | 2.26×10 <sup>2</sup> | 0.035*   | 40        | 0.027   |
| DC   | Spring | 5.05×10 <sup>2</sup> | 0.045*** | 105       | 0.053*  |
|      | Summer | 3.30×10 <sup>2</sup> | 0.029**  | 94        | 0.057*  |
|      | Fall   | 4.34×10 <sup>2</sup> | 0.046*** | 76        | 0.033*  |
|      | Winter | 2.83×10 <sup>2</sup> | 0.045**  | 4         | 0.006   |

p-value: \* &lt; 0.05; \*\* &lt; 0.01, \*\*\* &lt; 0.001
